# Supplementary material for: Hierarchical Lotus-Seedpod-Derived Porous Activated Carbon Encapsulated with NiCo2S4 for a High-Performance All-Solid-State Asymmetric Supercapacitor
Source: MDPI journal article supplement (doi:10.3390/molecules28135020), 2023-06-27
Supplement: s1 [file s1]

Supporting Information

# Hierarchical Lotus Seedpod-Derived Porous Activated Carbon Encapsulated with $\text{NiCo}_2\text{S}_4$ for High-Performance All-Solid-State Asymmetric Supercapacitor

Siyi Cheng, Xiaowu Wang, Kang Du, Yu Mao, Yufei Han, Longxiao Li, Xingyue Liu and Guojun Wen\*

<sup>1</sup> School of Mechanical Engineering and Electronic Information, China University of Geosciences, Wuhan 430074, China

\* Correspondence: wenguojun@cug.edu.cn; Tel.: +86-27-67883421

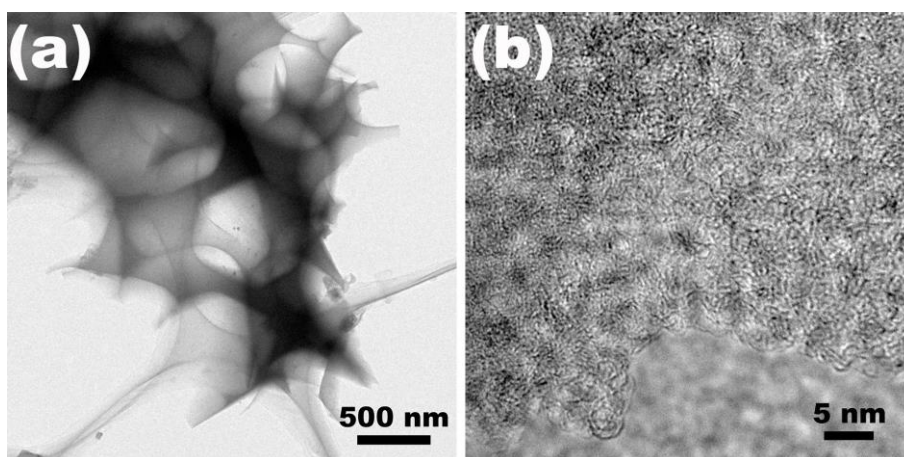

**Figure S1.** (a) TEM and (b) HRTEM images of the PAC.

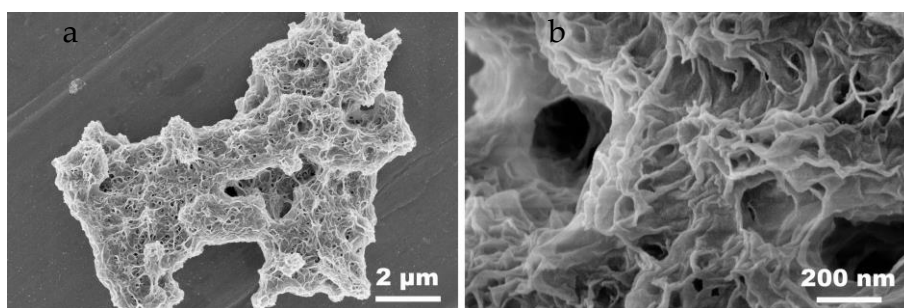

**Figure S2.** (a) Low and (b) high magnification SEM images of the PAC/NiCo precursor.

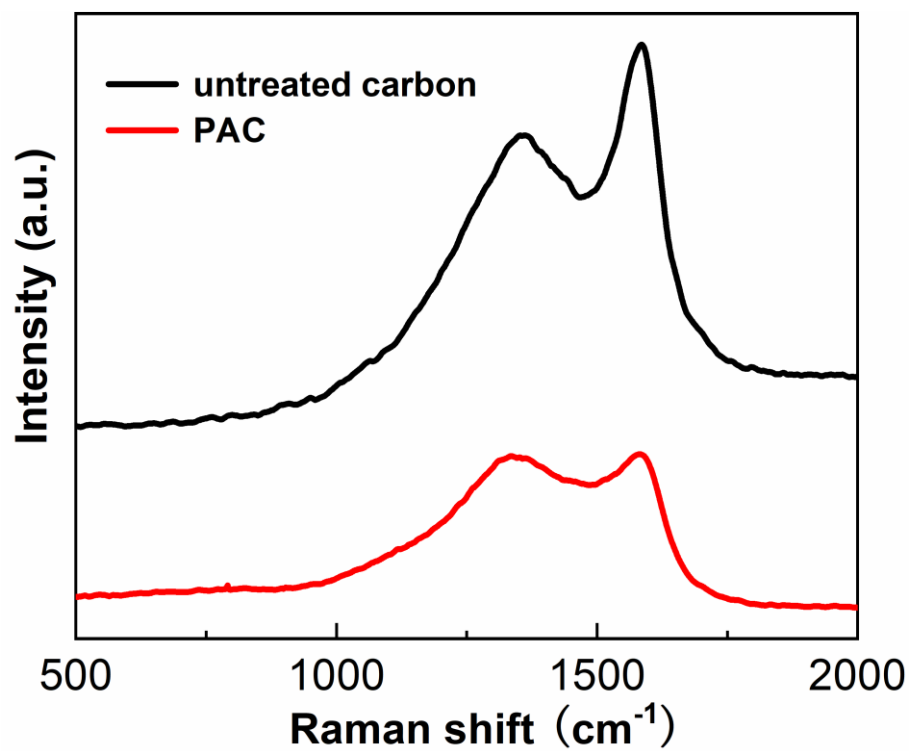

**Figure S3.** Raman spectra of the untreated carbon and the PAC.

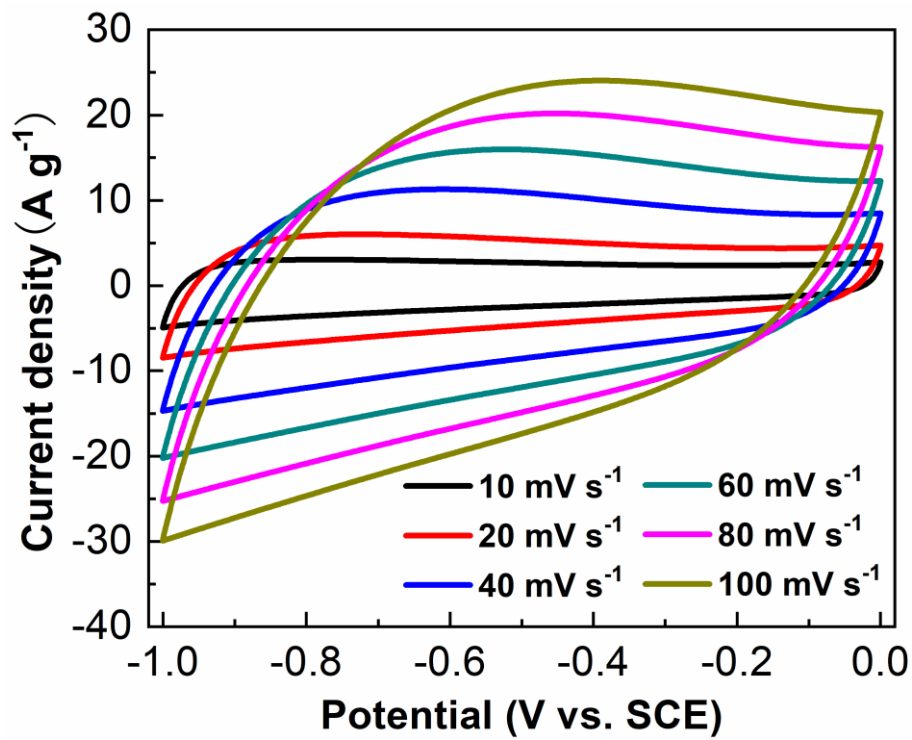

**Figure S4.** CV curves of the PAC at different scan rates.

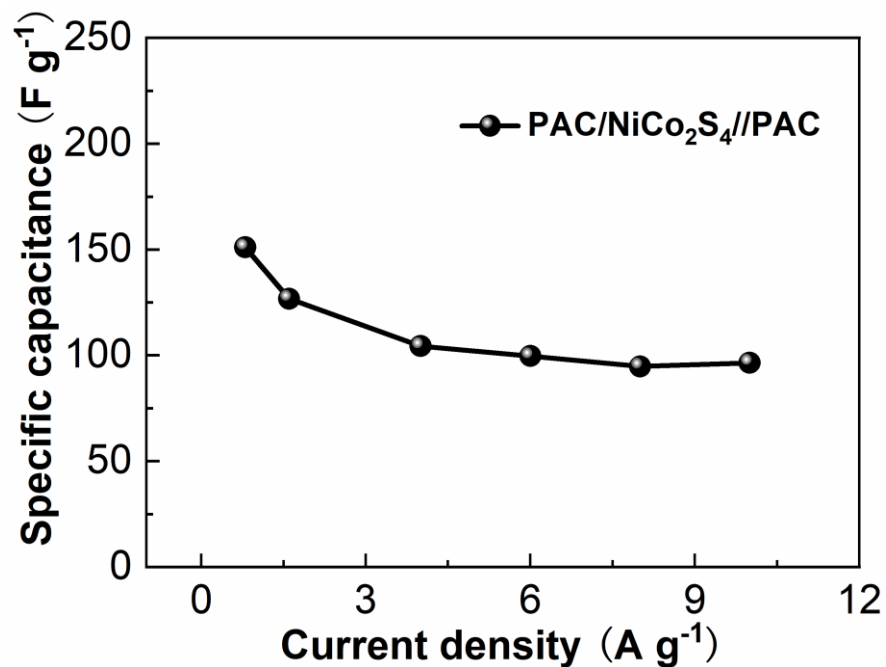

**Figure S5.** Specific capacitances of the PAC/NiCo<sub>2</sub>S<sub>4</sub>//PAC asymmetric supercapacitor at different current densities.

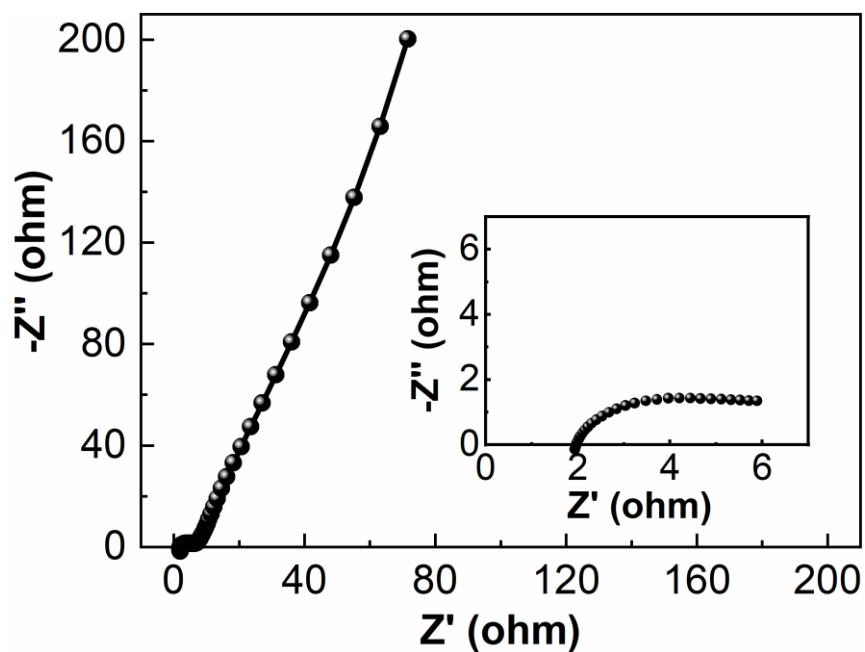

**Figure S6** Nyquist plot of the PAC/NiCo<sub>2</sub>S<sub>4</sub>//PAC asymmetric supercapacitor device; the insets is the enlarged Nyquist plot.
